# Supplementary material
Source: publisher figshare collection journal article supplement (https://geolsoc.figshare.com/ndownloader/files/14312855)
Supplement: Supplementary file 1 [file 14312855]

## Sheet: Sheet1
Table S2 Patuki Melange ch. 7 ICP-MS
	NZ13-325	NZ13-328	NZ13-329	NZ13-336	NZ13-336	NZ13-337	NZ13-337	NZ13-337	NZ13-353		NZ13-406	NZ13-408	NZ13-411	NZ13-412	N13 416		N14-238	N14-239	N14-240	N14-241	N14 242		NZ13-116	NZ13-117	NZ13-118	NZ13-119	NZ14 126	N214 127	NZ14 129		NZ13-117	NZ13-118	NZ13-119		N14-56		NZ13-81	NZ13-82	NZ13-83		N14 70	N14 71	N14 73	N14 75	N14-76	N14-81			N13 359
	basalt	basalt	basalt	Basalt	Basalt	basalt	basalt	basalt	basalt		basalt	basalt	basalt	basalt	metagabbro		pillow basalt	basalt	basalt	dolerite	dolerite		Diabase	feld-phyric andesite	basalt	diorite	dolerite	pillow basalt	gabbro		feld-phyric andesite	basalt	diorite		dolerite		dolerite	dolerite	diorite		basaltic clast, melange	feldspar-phyric basalt, melange	basaltic clast, melange (fresh)	med grained, intermed. rock, melange	Basalt	Basalt			basalt clast, melange
	D'Urville (lower unit)	D'Urville (lower unit)	D'Urville, (lower unit)	D'Urville (upper unit)	D'Urville (upper unit)	D'Urville (upper unit)	D'Urville (upper unit)	D'Urville (upper unit)	D'Urville (upper unit)		Taipare Bay	Taipare Bay	Taipare Bay	Taipare Bay	Taipare Bay		Dun Mountain area	Dun Mountain area	Dun Mountain area	Dun Mountain area	Dun Mountain area		Bald Hil	Bald Hil	Bald Hil	Bald Hil	Bald Hill	Bald Hill	Bald Hill		Bald Hill	Bald Hill	Bald Hill		Windley River		Black Ridge	Black Ridge	Black Ridge		Coal Hill	Coal Hill	Coal Hill	Coal Hill	Coal Hill incusion	Coal Hill incusion			Croisilles area
	S40 74553 E173 93583	S40 74553 E173 93583	S40 74553 E173 93583	S40 75506 E173 93807	S40 75506 E173 93807	S40 75506 E173 93807	S40 75506 E173 93807	S40 75506 E173 93807	S40 75747 E173 93250		S41 00987 E173 71999	S41 00999 E173 72023	S41 01077 E173 72051	S41 01077 E173 72051	S41 01224 E173 722236		E 25 42896 N 85527	E 25 42961 N 59 85596	E 25 43511 N 59 85980	E 25 43659 N 59 8621	E 25 43659 N 59 8621		S45 38040 E168 10885	S45 38040 E168 10885	S45 38040 E168 10885	S45 37906 E168 11724	E21 27305 N55 24905	E21 28124 N55 5251	E21 29200 N55 27437		S45 38040 E168 10885	S45 38040 E168 10885	S45 37906 E168 11724		E21 38040 N55 06716		S45 65517 E168 22969	S45 65517 E168 22969	S45 65517 E168 22969		E21 30964 N55 08670	E21 30964 N55 08670	E21 30964 N55 08670	E21 31237 N55 08811	E21 31533 N 55 09891	E21 31420 N55 09648			S41 10872 E173 62987
Ba	50	64	59	133	49	13	29	256	48		5	31	9	10	16		284	15	14	11	8		580	37	3	249	79	201	91		21	82	31		8		21	82	31		390	273	224	20	130	62			61
Be	2	<1	<1	<1	2	<1	2	3	5		<1	1	3	1	4		1	<1	<1	1	1		3	<1	1	<1	<1	<1	<1		<1	<1	<1		1		<1	<1	<1		2	<1	<1	2	<1	<1			1
Co	44.2	50.4	67.2	77.6	28.2	43.6	27.3	20.9	23.9		22.8	40.2	18	34.9	31.1		16.1	52.8	65.4	69	42.5		16.8	57.4	45.9	40.8	37.8	43.9	46.9		44.4	43.4	45.9		52.4		44.4	43.4	45.9		26.8	75.4	37.8	38.5	33.8	39.2			48.7
Cs	<0.1	<0.1	0.5	2.5	<0.1	<0.1	<0.1	3.9	0.2		<0.1	0.3	<0.1	0.1	<0.1		1.6	0.2	0.6	0.5	<0.1		6.2	0.5	<0.1	0.1	0.2	0.3	0.8		<0.1	<0.1	<0.1		<0.1		<0.1	<0.1	<0.1		4.4	0.8	0.4	<0.1	0.6	0.3			1.7
Ga	19	16.3	23.3	24.2	21.9	17.5	36.2	18.1	17.2		11.9	15.6	8.7	16.9	18.4		13.4	11.8	12.6	16	12.4		20.4	17.9	12.7	14.3	15.4	12.2	14.4		13.9	15.1	16		13.9		13.9	15.1	16		15.4	13.9	12.2	17.3	9	15.8			15
Hf	4.9	4.9	4.3	5.9	3.8	1.5	4.5	3.5	2.1		1.9	2.2	1.4	2.3	3.4		5.1	1.8	2	2.2	1.8		6.9	2.9	1	1.5	2.6	1.9	2.1		3.3	2.5	1.9		2.4		3.3	2.5	1.9		5.4	2.1	1.7	2.8	2.7	1.7			5.1
Nb	42.1	39.4	30	8.4	1.8	1	2.8	7	1.8		2.1	1	1.4	1.1	1.4		5.5	1	1.2	1.4	1		7.1	2.4	0.2	0.6	1.1	0.6	0.8		1.3	0.9	0.6		1		1.3	0.9	0.6		6.9	1.3	0.7	1.5	1.5	0.7			4.7
Rb	0.8	0.8	5.3	98.2	1.5	0.7	0.8	153.3	3.4		<0.1	7	0.4	1.5	0.8		45.1	4.4	9.4	6.4	0.5		115.3	12.2	0.2	18.2	16.5	5.8	66.9		0.8	2.6	1.2		0.7		0.8	2.6	1.2		81	47.4	16.1	2.8	34.4	13.4			18.7
Sn	2	1	1	2	4	<1	1	3	<1		<1	<1	<1	<1	<1		2	<1	<1	<1	<1		2	<1	<1	<1	<1	<1	<1		<1	<1	<1		<1		<1	<1	<1		2	<1	<1	<1	<1	<1			1
Sr	273.4	300	198.4	17.1	389.8	19.4	2437.2	146.8	125.4		236.8	59.9	452.5	24.2	28.7		310.9	291.1	156.3	206.7	48.2		276.6	164.7	77	513.3	356	378	146.5		93	245.9	168.2		132.5		93	245.9	168.2		214.8	314.5	701.8	81.4	297.9	154.9			104.5
Ta	4.9	4.6	3	1.5	1.1	1	2.7	0.5	0.9		1.2	0.4	3	0.5	0.5		1.6	1.5	3.2	3.4	3.4		1.6	1.8	4.2	2	1.7	2	0.9		1.4	1.5	2.3		1.8		1.4	1.5	2.3		2.9	1.5	0.8	1.3	1.6	0.7			0.7
Th	3.2	2.9	2	8.3	<0.2	0.3	0.3	7.3	<0.2		2.1	<0.2	1.1	<0.2	0.3		7.3	<0.2	<0.2	<0.2	<0.2		10.6	<0.2	<0.2	<0.2	0.5	0.3	0.4		0.3	<0.2	<0.2		<0.2		0.3	<0.2	<0.2		9.4	0.3	0.3	0.4	0.5	0.3			0.4
U	0.6	0.7	0.8	0.8	<0.1	0.1	0.2	1.4	0.1		0.4	0.1	0.3	0.1	0.1		1.9	<0.1	<0.1	<0.1	<0.1		3.1	<0.1	<0.1	0.1	0.4	0.8	0.1		<0.1	<0.1	<0.1		<0.1		<0.1	<0.1	<0.1		2.2	0.4	<0.1	0.3	0.2	0.2			0.4
V	345	250	410	256	235	296	410	123	303		178	297	153	385	342		64	235	265	300	305		106	402	260	277	367	423	413		422	315	362		298		422	315	362		101	361	426	535	287	309			424
W	236.9	200.7	87.1	38	81.9	88.6	222.6	11.2	65.6		92.9	31.1	309	24.8	39.8		132.7	123.3	249.1	194.3	210.8		95.8	121.8	269.2	172.8	131	161.4	85		100.8	103.2	166.8		124.9		100.8	103.2	166.8		166.6	124.1	65.3	137.1	132.1	77.3			51.9
Zr	224.9	217.3	200.1	203.7	156.4	54.1	178.8	127	76		68	76.3	41.3	84.3	108.9		188.6	62.8	71.4	79.8	57.1		237.2	109.9	29.3	39.5	80.2	54.9	70.2		126.7	85.4	60.7		83.2		126.7	85.4	60.7		200	79.5	51.8	85.7	94.3	52.5			183.3
Y	41.4	29.6	36.5	18.4	47.1	19.9	43.4	35.2	29.8		16.8	25.4	11.8	26.8	32.3		19.4	21.3	21.8	27.7	21.8		26.6	38.6	12.6	14.7	19.7	17.6	18		40.9	30.8	24.1		29.6		40.9	30.8	24.1		18.4	20.6	14.4	25.9	16.6	20.6			52.5
La	38.7	31.5	24.6	8.4	5.5	4	5.2	28.5	3.2		9.2	2.8	6.3	3.6	4.6		20.2	2.3	3.7	3.3	2.9		25.8	4.5	2.2	1.8	4.5	5.1	6		4.4	2.8	2.7		2.6		4.4	2.8	2.7		20.4	5.4	4.2	7.8	4.6	3.4			8.2
Ce	65.5	63.1	50.6	47.2	15.1	7.5	15.6	63.4	8.1		19.7	9	11.4	9.4	13.6		44.2	7.2	8.4	10	7.9		60.3	12.6	4.6	5.4	14.1	14.1	14.2		12.4	9.2	7.3		8.3		12.4	9.2	7.3		42.5	13.3	11.1	20.7	13.7	8.9			22.3
Pr	8.77	7.67	6.17	1.77	2.66	1.38	2.64	6.28	1.46		2.48	1.31	1.52	1.55	2.19		4.79	1.13	1.42	1.45	1.2		6.64	2.01	0.75	0.83	2.06	2.04	1.94		2.26	1.5	1.21		1.45		2.26	1.5	1.21		4.69	2.25	1.77	2.89	2.15	1.39			3.51
Nd	35.8	30.1	24.5	6.9	14.6	5.6	15.1	25.3	8.7		11.2	7.5	7.1	8.6	11.7		18.3	7.4	7.7	8.5	7.1		26.8	11.4	3.8	4.7	10.5	10.6	9.2		12.6	8.5	6.4		8.2		12.6	8.5	6.4		16.8	12.3	9.4	15	10.2	6.6			18.4
Sm	6.78	5.85	5.56	1.81	5.19	2.06	4.87	5.87	3.01		2.86	2.58	1.8	2.9	3.72		3.86	2.26	2.67	2.78	2.17		5.05	3.53	1.2	1.76	3.26	2.74	2.58		4.49	3.03	2.23		2.93		4.49	3.03	2.23		3.97	3.44	2.72	4.01	2.97	2.3			5.97
Eu	2.32	1.94	1.92	0.49	1.86	0.74	1.72	1.34	1.23		0.93	0.95	0.58	1.06	1.3		0.8	0.89	1	1.15	0.97		1.15	1.37	0.51	0.59	0.86	1.01	0.85		1.45	1.07	0.91		1.21		1.45	1.07	0.91		1	1.03	1.07	1.31	0.82	0.82			2.04
Gd	7.24	6.55	6.36	2.69	6.87	2.73	6.88	6.07	4.38		3.17	3.68	2.17	4.06	5.23		3.97	3.36	3.76	4.13	3.16		4.83	5.44	1.89	2.25	3.45	3.19	2.9		6.03	4.32	3.5		4.55		6.03	4.32	3.5		3.48	3.58	2.86	4.48	3.03	2.97			8.3
Tb	1.13	0.92	1.03	0.48	1.2	0.53	1.22	0.99	0.77		0.5	0.66	0.33	0.75	0.86		0.58	0.6	0.63	0.74	0.58		0.78	0.98	0.32	0.41	0.56	0.5	0.49		1.13	0.77	0.62		0.87		1.13	0.77	0.62		0.57	0.61	0.48	0.75	0.53	0.49			1.47
Dy	6.71	5.41	6.52	3.45	8.46	3.7	7.72	6.19	5.22		2.92	4.3	2.02	4.76	6.01		3.76	3.84	4.02	4.87	3.99		4.43	6.65	2.48	2.63	3.55	3.12	3.17		7.63	5.64	4.37		5.4		7.63	5.64	4.37		3.54	3.62	2.89	4.48	2.98	3.1			9.77
Ho	1.37	1.12	1.36	0.81	1.73	0.73	1.76	1.33	1.15		0.66	0.94	0.46	1.08	1.26		0.75	0.85	0.8	1.01	0.78		1.06	1.41	0.52	0.57	0.76	0.6	0.67		1.53	1.12	0.89		1.2		1.53	1.12	0.89		0.75	0.82	0.63	0.92	0.61	0.7			2.05
Er	3.82	3.04	3.72	2.45	4.9	2.21	4.74	3.72	3.06		1.84	2.78	1.1	3.04	3.69		2.09	2.4	2.5	2.71	2.38		2.85	4.26	1.45	1.88	2.29	1.77	1.8		4.61	3.3	2.65		3.63		4.61	3.3	2.65		2.14	2.26	1.82	2.69	1.8	2.24			5.93
Tm	0.51	0.41	0.58	0.37	0.75	0.3	0.64	0.56	0.52		0.26	0.4	0.17	0.42	0.52		0.34	0.34	0.36	0.44	0.35		0.41	0.62	0.19	0.27	0.33	0.29	0.28		0.72	0.48	0.41		0.49		0.72	0.48	0.41		0.34	0.35	0.26	0.39	0.27	0.34			0.87
Yb	3.25	2.82	3.65	2.41	5.12	2.13	4.77	3.8	3.02		1.77	2.81	1.1	2.81	3.42		2.12	2.24	2.15	2.74	2.18		2.74	4.03	1.27	1.75	1.94	1.91	1.73		4.36	3.28	2.45		3.22		4.36	3.28	2.45		2.23	2.39	1.86	2.38	1.81	2.05			5.26
Lu	0.54	0.4	0.55	0.36	0.8	0.31	0.73	0.63	0.48		0.25	0.42	0.19	0.43	0.53		0.35	0.33	0.36	0.44	0.34		0.38	0.64	0.23	0.29	0.34	0.28	0.28		0.65	0.5	0.41		0.54		0.65	0.5	0.41		0.39	0.35	0.29	0.4	0.28	0.36			0.87
[truncated: 10 more columns]
